# Supplementary material for: Future Changes in Seasonal Temperature Over Pakistan in CMIP6
Source: Preprints.org preprint supplement (doi:10.20944/preprints202101.0188.v1), 2021-01-11
Supplement: Supplementary file 4 [file supplementary]

*
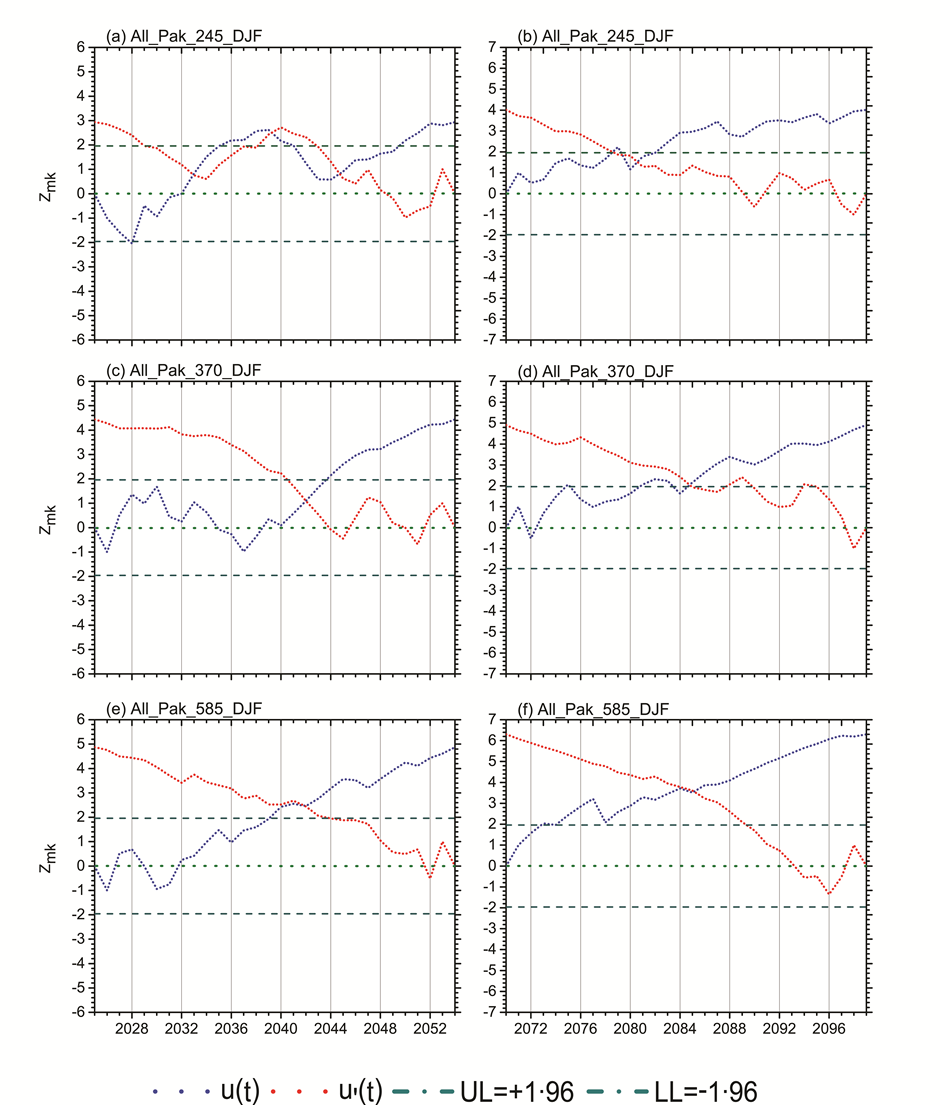
*

**Figure S1.** Temporal abrupt changes in DJF season trend for surface mean temperature trends for 2025-2054 and 2070-2099 time periods over Pakistan. Blue color line defines the progressive series while the red one identifies retrograde series for the change (intersection) detection at 95% confidence level (viridian color lines).


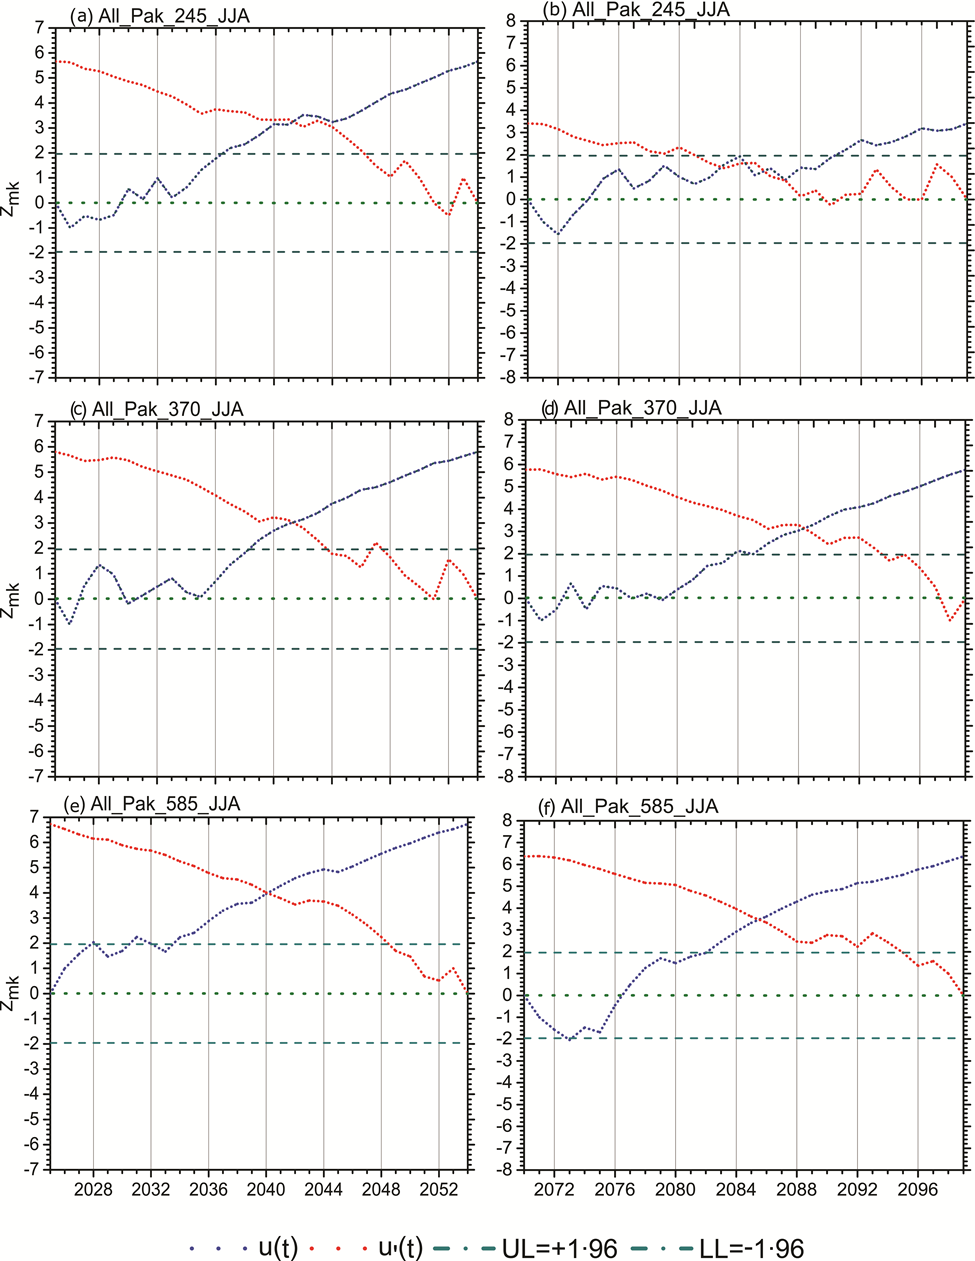


**Figure S2.** Temporal abrupt changes in the JJA season trend for surface mean temperature trends for 2025-2054 and 2070-2099 time periods over Pakistan. The blue color line defines the progressive series, while the red one identifies retrograde series for the change (intersection) detection at a 95% confidence level (viridian color lines).


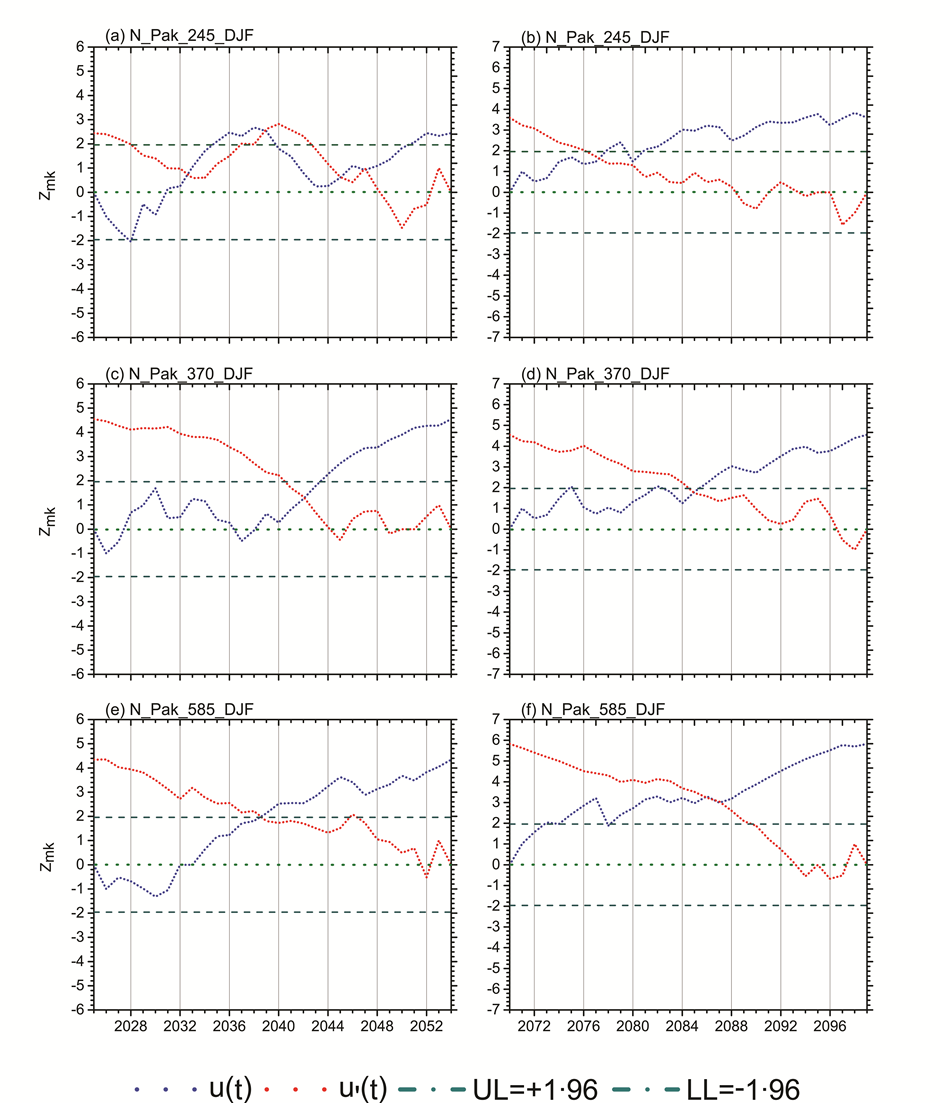


**Figure S3.** Same as **S1**, but for Northern Pakistan.


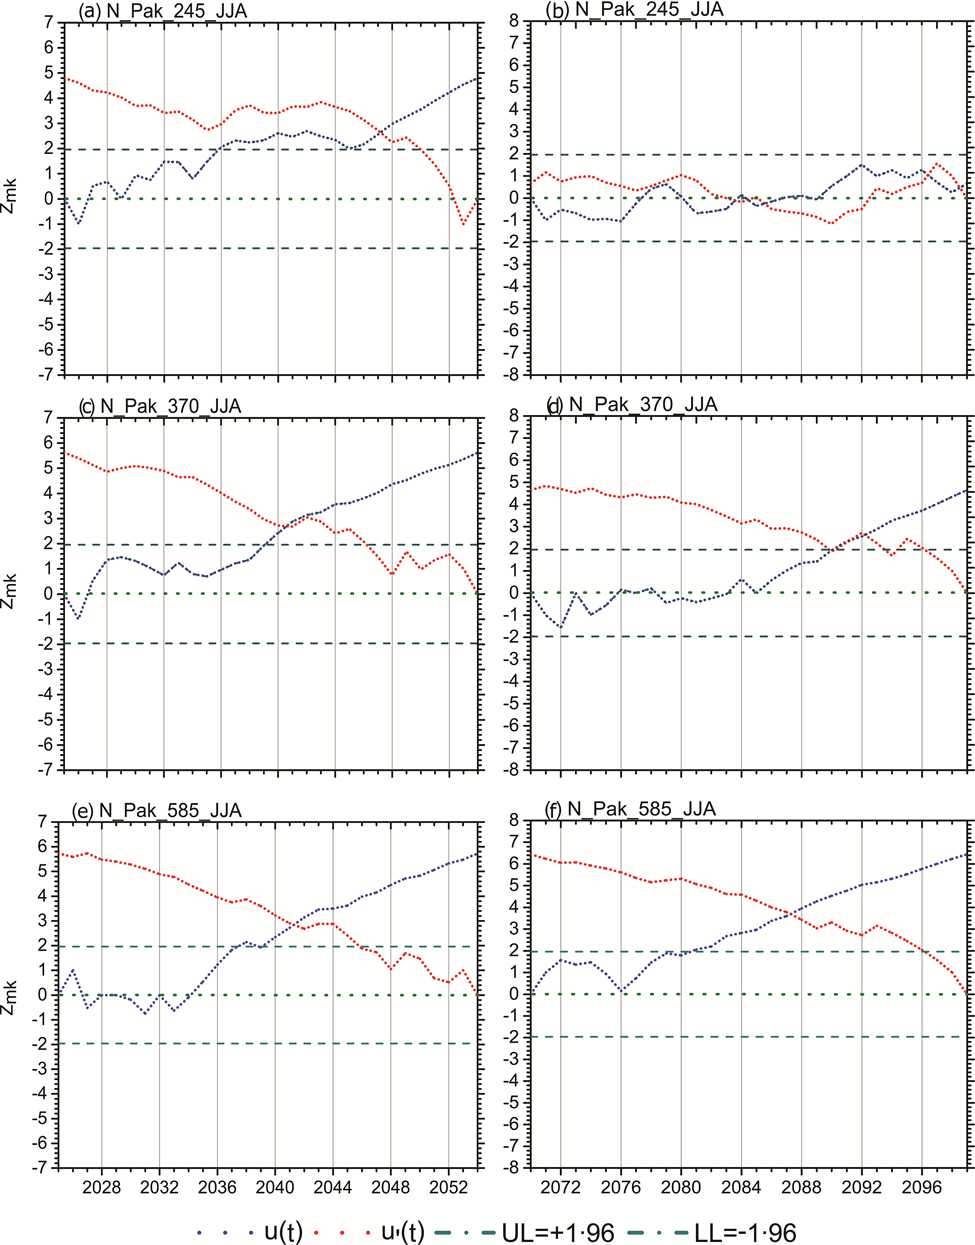


**Figure S4.** Same as **S2**, but for Northern Pakistan.


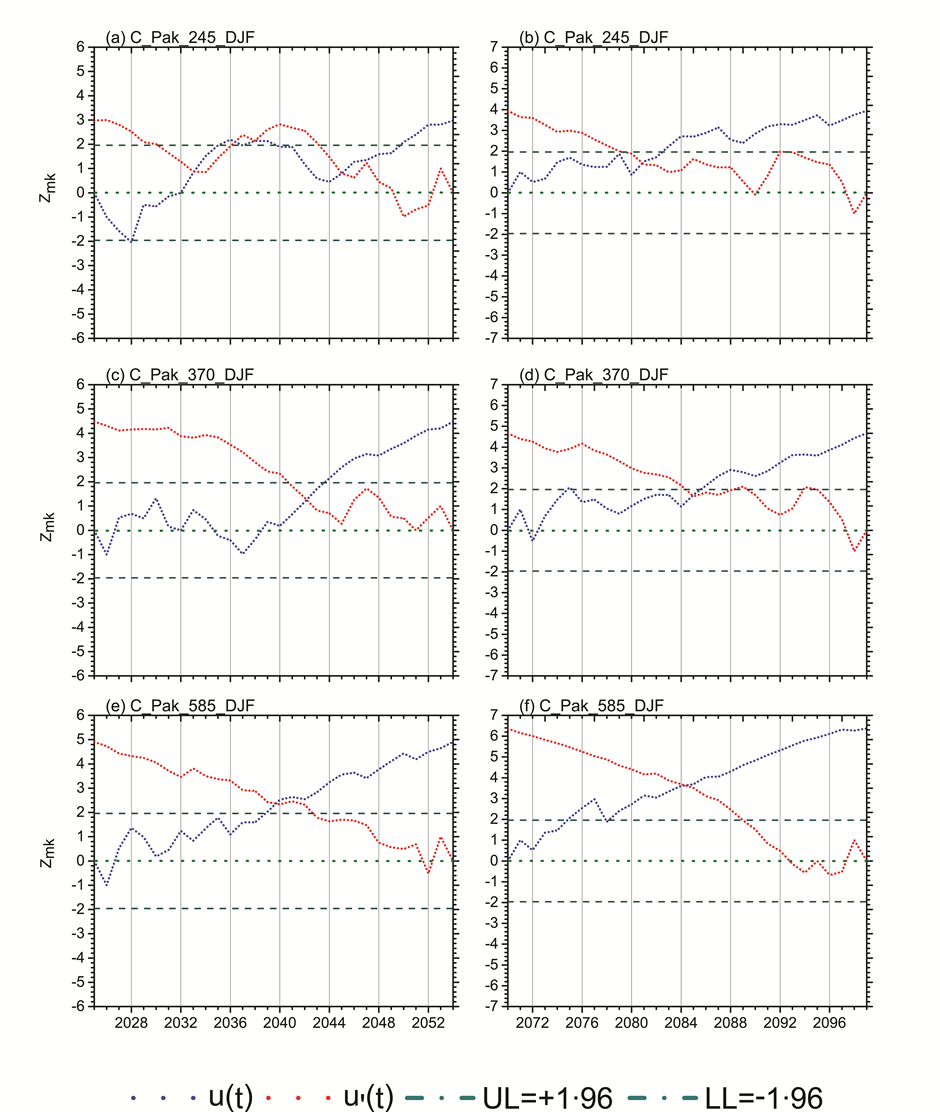


**Figure S5.** Same as figure **S1**, but for Central Pakistan


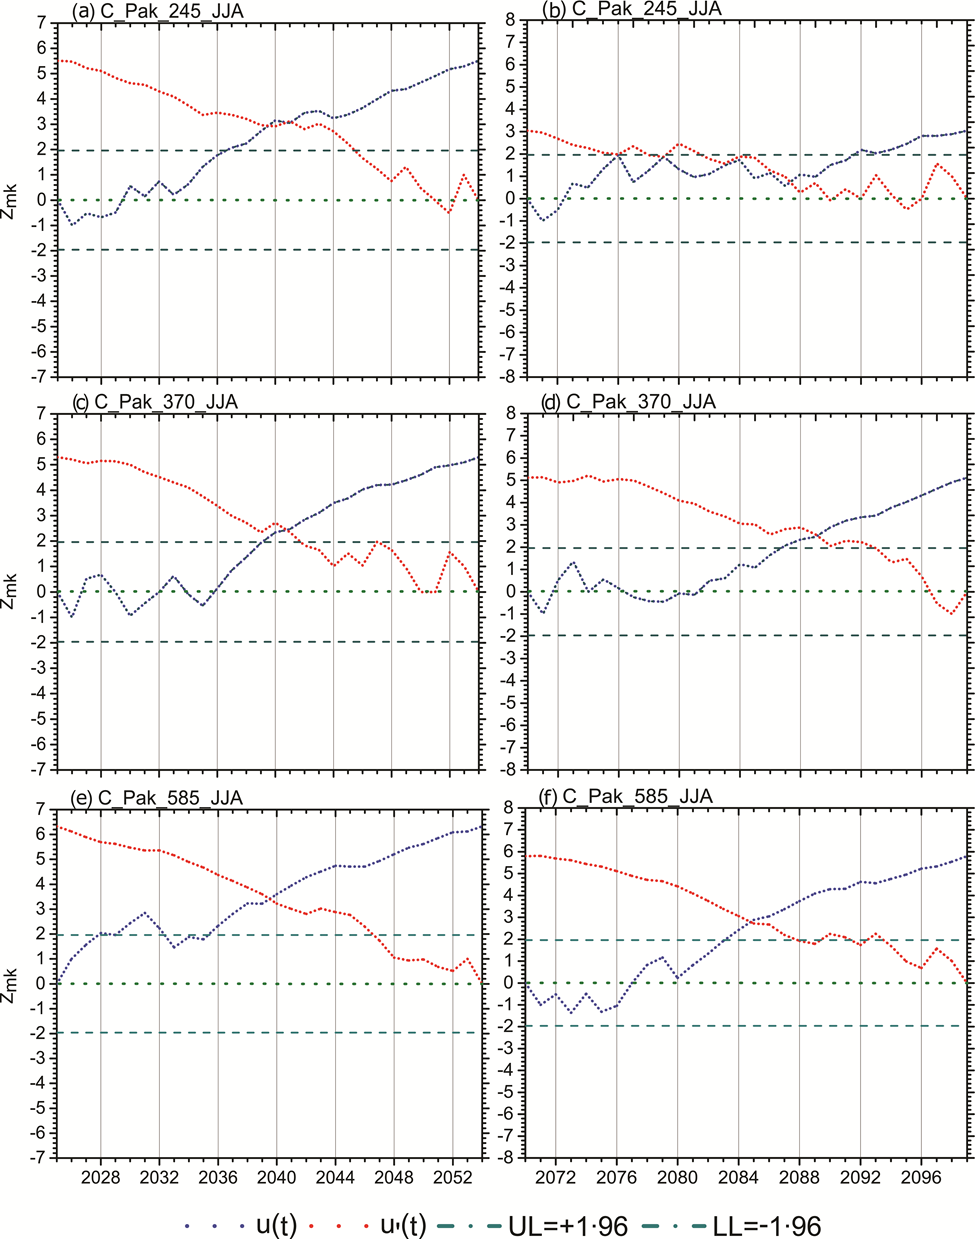


**Figure S6.** Same as figure **S2**, but for Central Pakistan


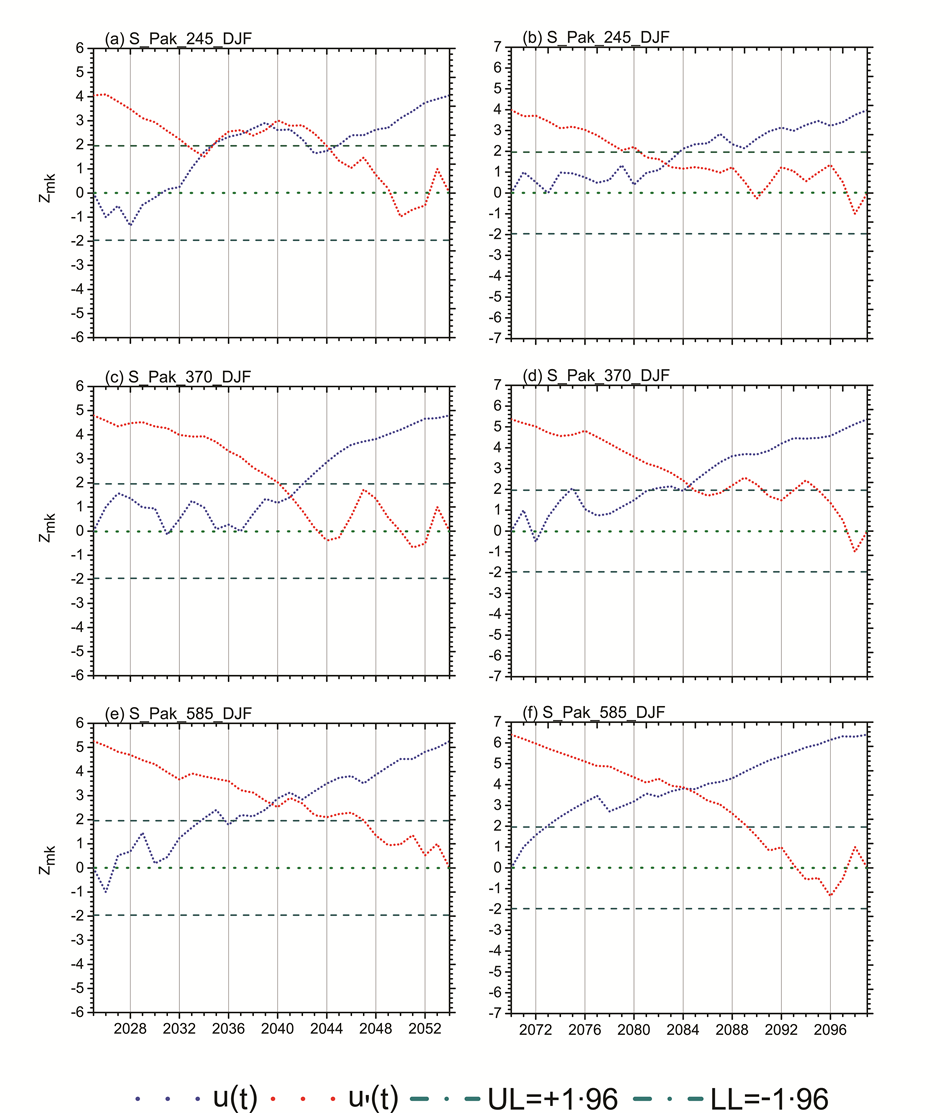


**Figure S7.** Same as figure **S1**, but for Southern Pakistan


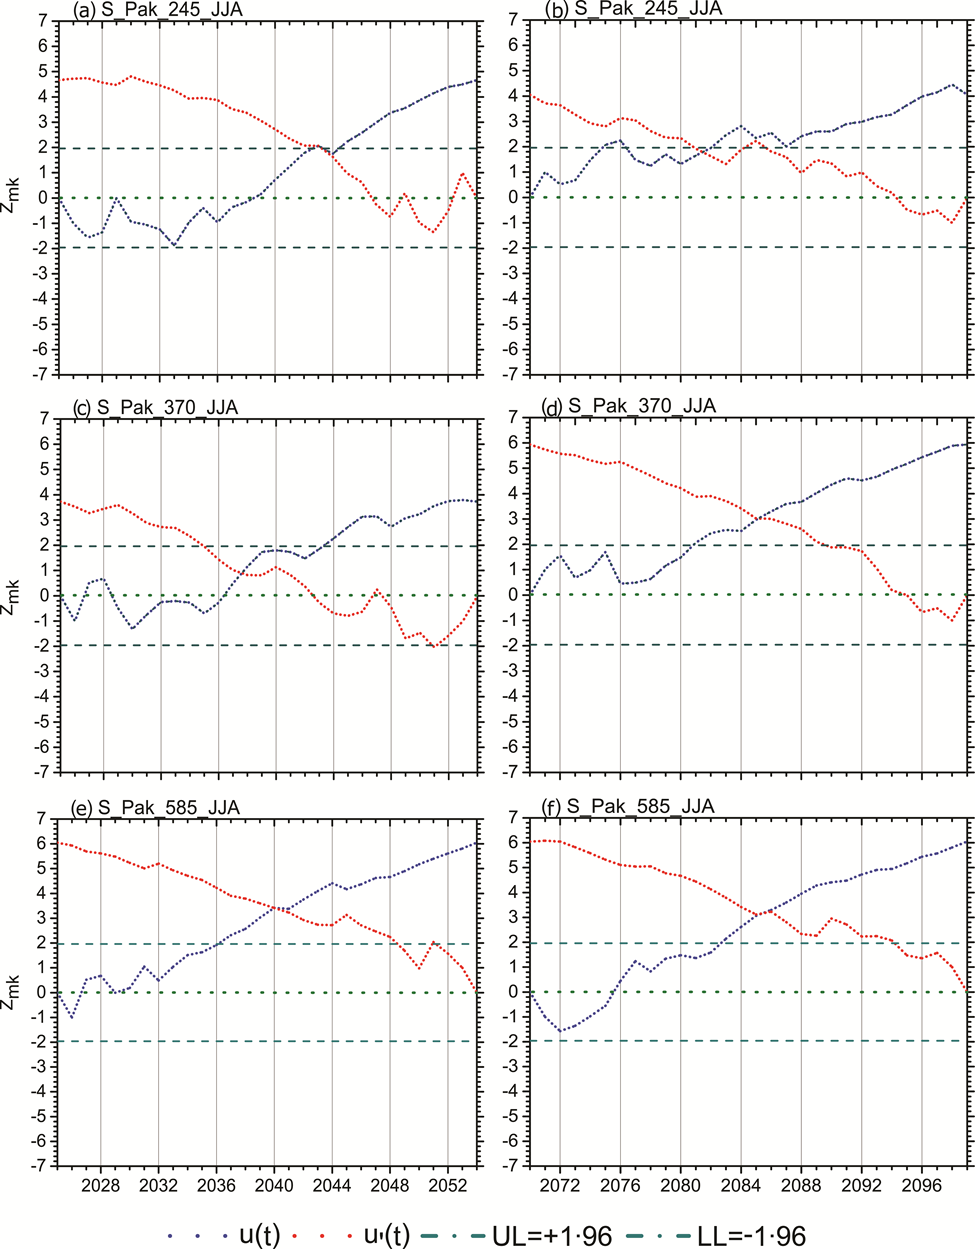


**Figure S8.** Same as figure **S2**, but for Southern Pakistan
